# Supplementary material for: Structure of Fam20A reveals a pseudokinase featuring a unique disulfide pattern and inverted ATP-binding
Source: eLife journal article supplement (doi:10.7554/elife.23990), 2017-04-22
Supplement: supp [file elife-23990-supp-v1.zip]

|                |                                                                               | <div><div>Kα2</div><div>○○○○○○○○○○○○○○○○</div></div>                                                   | <div><div>Kβ1</div><div>→</div></div> | <div><div>Kα2A</div><div>○○○○</div></div> | <div><div>Kα2B</div><div>○○○○</div></div> | <div><div>Kβ2</div><div>→</div></div> |
|----------------|-------------------------------------------------------------------------------|--------------------------------------------------------------------------------------------------------|---------------------------------------|-------------------------------------------|-------------------------------------------|---------------------------------------|
| Fam20A         | H.sapiens                                                                     | SPVVS <del>KL</del> LQDMRHFP <del>TI</del> SADYSQDEKALLGA <del>CD</del> CTQIVKPSGVHLKLVLR <del>F</del> |                                       |                                           |                                           |                                       |
|                | M.musculus                                                                    | SLAISKLLHDMRHFP <del>TI</del> SADYSQDEKALLGA <del>CD</del> CSQIVKPSGVHLKLVLR <del>F</del>              |                                       |                                           |                                           |                                       |
|                | R.norvegicus                                                                  | SPVVS <del>KL</del> LHDMRHFP <del>TI</del> SADHSQDEKALLGA <del>CD</del> CSQIVKPSGVHLKLVLR <del>F</del> |                                       |                                           |                                           |                                       |
|                | G.gallus                                                                      | SPAVSRLLRDMHDFATISADYSQDEKALLGA <del>CD</del> CSQIVKPSGVHLKLVLR <del>F</del>                           |                                       |                                           |                                           |                                       |
|                | D.rerio                                                                       | DSSVD <del>TL</del> LQDMQTD <del>TV</del> INADFTQDEKALKGA <del>CD</del> CSQVVKPSGLHLKLAL <del>KL</del> |                                       |                                           |                                           |                                       |
| Fam20B         | H.sapiens                                                                     | TPELGAVMHAMATKKI <del>IK</del> ADVGYK-----GTQLKALLI <del>L</del>                                       |                                       |                                           |                                           |                                       |
|                | M.musculus                                                                    | TPELGAIMHAMATKKI <del>IK</del> ADVGYK-----GTQLKALLI <del>L</del>                                       |                                       |                                           |                                           |                                       |
|                | R.norvegicus                                                                  | TPELGAVMHAMATKKI <del>IK</del> ADVGYK-----GTQLKALLT <del>L</del>                                       |                                       |                                           |                                           |                                       |
|                | G.gallus                                                                      | TPELGAVMHAMSTKKI <del>IK</del> ADVGYK-----GTQLKALLI <del>L</del>                                       |                                       |                                           |                                           |                                       |
|                | D.rerio                                                                       | TPELAAVLNALATAHVERADVGYK-----GTQLKALLV <del>L</del>                                                    |                                       |                                           |                                           |                                       |
| D.melanogaster | DSSMGQLLET <del>LR</del> REPIT <del>RV</del> SNLGR-----GTQLKLLV <del>RL</del> |                                                                                                        |                                       |                                           |                                           |                                       |
| Fam20C         | H.sapiens                                                                     | NPAIEALLHDLSSQRIT <del>SV</del> AMKSG-----GTQLKLIMT <del>F</del>                                       |                                       |                                           |                                           |                                       |
|                | M.musculus                                                                    | NPAIDALLRDLGSQKIT <del>SV</del> AMKSG-----GTQLKLIMT <del>F</del>                                       |                                       |                                           |                                           |                                       |
|                | R.norvegicus                                                                  | NPAIDALLHDLGSQKIT <del>SV</del> AMKSG-----GTQLKLIMT <del>F</del>                                       |                                       |                                           |                                           |                                       |
|                | G.gallus                                                                      | DPLMP <del>TL</del> LQDLATMKIVSSVQKSG-----GTQLKLIMT <del>F</del>                                       |                                       |                                           |                                           |                                       |
|                | D.rerio                                                                       | NPVITALLRDL <del>LS</del> QKISSVGMKSG-----GTQLKLIMS <del>F</del>                                       |                                       |                                           |                                           |                                       |
|                | D.melanogaster                                                                | DTLVDAVLRDMIKLP <del>IQ</del> HVVQKEG-----GTQLKLII <del>EY</del>                                       |                                       |                                           |                                           |                                       |
| C.elegans      | DQMIDNLLHDLN <del>TS</del> PIKHVHIMDG-----GTQVKFV <del>FT</del>               |                                                                                                        |                                       |                                           |                                           |                                       |

## Figure 1-figure supplement 2
