# Supplementary material for: Structure of Fam20A reveals a pseudokinase featuring a unique disulfide pattern and inverted ATP-binding
Source: eLife journal article supplement (doi:10.7554/elife.23990), 2017-04-22
Supplement: supp [file elife_poa_e23990_Figure_1_figure_supplement_table_1.doc]

**Figure 1-figure supplement table 1.** Data collection and refinement statistics.

|  | Fam20A  (PDB ID: 5WRR) | Fam20A with ATP  (PDB ID: 5WRS) |
| --- | --- | --- |
| **Data collection** |  |  |
| Space group | P 32 2 1 | P 32 2 1 |
| Cell dimensions | a=156.854 Å,  b=156.854 Å,  c=143.655 Å | a=157.202 Å,  b=157.202 Å,  c=144.802 Å |
| Wavelength (Å) | 0.979 | 1.009 |
| Resolution (Å) | 2.50 | 2.75 |
| *R*merge | 0.172 (1.804) | 0.168 (1.470) |
| *R*pim | 0.055 (0.566) | 0.053 (0.472) |
| CC1/2 (highest-resolution shell) | 0.841 | 0.788 |
| *I* / *I* | 28.8 (2.8) | 21.2 (2.4) |
| Completeness (%) | 99.9 (100.0) | 99.9 (100.0) |
| Multiplicity | 10.9 (11.1) | 10.7 (10.6) |
| Wilson B-factor | 54.1 | 57.3 |
| **Refinement** |  |  |
| Reflections used in refinement | 70216 (6906) | 55095 (5234) |
| Reflections used for *R*free | 1994 (197) | 1986 (191) |
| *R*work / *R*free | 0.214 / 0.232 | 0.202 / 0.239 |
| No. of non-hydrogen atoms |  |  |
| Protein | 7039 | 7018 |
| Ligands | 112 | 174 |
| Protein residues | 877 | 876 |
| *B*-factors |  |  |
| Protein | 77.9 | 72.5 |
| Ligands | 127.8 | 114.0 |
| R.m.s deviations |  |  |
| Bond lengths (Å) | 0.004 | 0.004 |
| Bond angles () | 0.666 | 0.705 |
| Ramachandran |  |  |
| Favored (%) | 97.0 | 96.8 |
| Allowed (%) | 3.0 | 3.2 |
| Outliers (%) | 0 | 0 |

Each dataset was collected from a single crystal. Values in parentheses are for highest-resolution shell.
