# Supplementary figures and images for: Structure of Fam20A reveals a pseudokinase featuring a unique disulfide pattern and inverted ATP-binding
Source: eLife journal article supplement (doi:10.7554/elife.23990), 2017-04-22

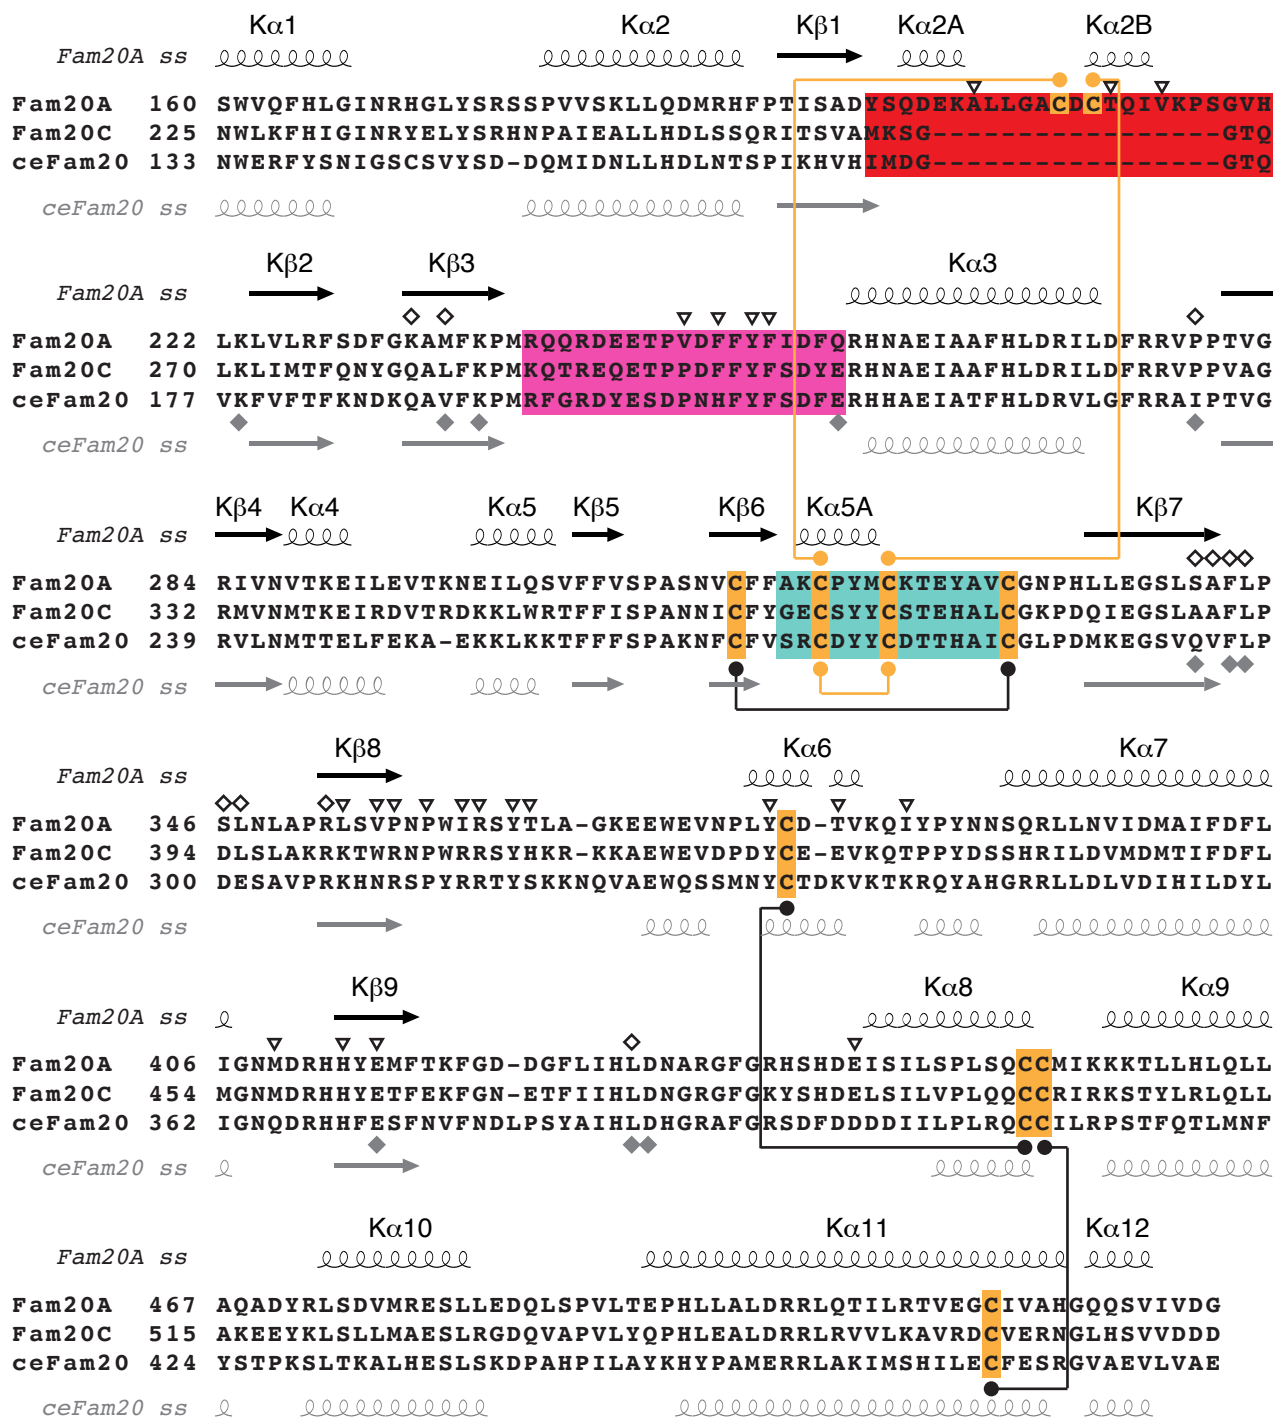

Figure 1-figure supplement 1

Supplement: supp [file elife-23990-supp-v1.zip]
